# Supplementary material
Source: PubMed Central journal article supplement (PMC11687575)
Supplement: NIHPP2024.02.14.580408v3-supplement-1.pdf [file NIHPP2024.02.14.580408v3-supplement-1.pdf]

602 **Supplemental information**

603 **Model of go/no-go task**

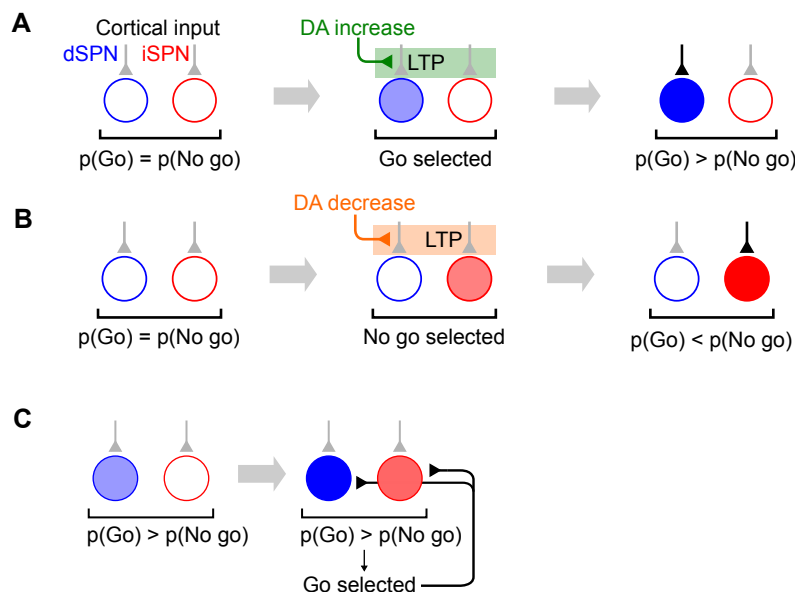

Supplemental Fig. 1: Go/no-go task. **A.** Example in which dSPN plasticity produces correct learning behavior in a go/no-go task. Left: cortical inputs to the dSPN and iSPN are equal prior to learning. Shading of corticostriatal connections indicates synaptic weight, and shading of blue and red circles denotes dSPN/iSPN activity. Middle: the “go” response is selected, corresponding to elevated dSPN activity. In this example, the “go” response is rewarded, leading to elevated DA activity and thus potentiation of the dSPN input synapse. Right: in a subsequent trial, cortical input to the dSPN is stronger, increasing the likelihood of selecting the “go” response. **B.** Example in which iSPN plasticity produces incorrect learning behavior in a go/no-go task. Left: same as panel B. Middle: the “no go” response is selected, corresponding to elevated iSPN activity. In this example, the “no-go” response is punished, leading to decreased DA activity and thus potentiation of the iSPN input synapse. Right: in a subsequent trial, cortical input to the iSPN is stronger, decreasing the likelihood of selecting the “go” response. **C.** Illustration of the efference model in a go/no-go task. Left: feedforward SPN activity driven by cortical inputs. Right: once the “go” response is selected, the dSPN and iSPN are both excited by efferent input, which is combined with their original input. As a result, both the dSPN and iSPN are more active than prior to action selection, but the dSPN is still more active than the iSPN.

604 **Relationship between sum mode activity and future difference mode activity**

605 In the main text we provided an argument for why sum mode activity drives changes to future  
 606 difference mode activity, assuming a linear  $f^{d/iSPN}(\delta)$  and linear neural activation functions. Here  
 607 we generalize this argument to more general learning rules and activation functions  $\phi$ , assuming  
 608 only that  $f^{dSPN}(\delta)$  is monotonically increasing,  $f^{iSPN}(\delta)$  is monotonically increasing, and  $\phi(\cdot)$  is  
 609 monotonically increasing. We have that  $y^{d/iSPN} = \phi(\mathbf{w}^{d/iSPN} \cdot \mathbf{x})$ , and  $\delta \mathbf{w}^{d/iSPN} = (f^{d/iSPN}(\delta) \cdot$   
 610  $y^{d/iSPN}) \mathbf{x}$ . Thus, in the limit of small small weight updates, we can write:

$$\begin{aligned}
\Delta(y^{\text{dSPN}} - y^{\text{iSPN}}) &= \Delta\phi(\mathbf{w}^{\text{dSPN}} \cdot \mathbf{x}) - \Delta\phi(\mathbf{w}^{\text{iSPN}} \cdot \mathbf{x}) \\
&\approx \phi'(\mathbf{w}^{\text{dSPN}} \cdot \mathbf{x})(\Delta\mathbf{w}^{\text{dSPN}} \cdot \mathbf{x}) - \phi'(\mathbf{w}^{\text{iSPN}} \cdot \mathbf{x})(\Delta\mathbf{w}^{\text{iSPN}} \cdot \mathbf{x}) \\
&\propto \phi'(\mathbf{w}^{\text{dSPN}} \cdot \mathbf{x})(f^{\text{dSPN}}(\delta) \cdot y^{\text{dSPN}} \mathbf{x} \cdot \mathbf{x}) - \phi'(\mathbf{w}^{\text{iSPN}} \cdot \mathbf{x})(f^{\text{iSPN}}(\delta) \cdot y^{\text{iSPN}} \mathbf{x} \cdot \mathbf{x}) \\
&= \|\mathbf{x}\|^2 \left( \phi'(\mathbf{w}^{\text{dSPN}} \cdot \mathbf{x})(f^{\text{dSPN}}(\delta) \cdot y^{\text{dSPN}}) - \phi'(\mathbf{w}^{\text{iSPN}} \cdot \mathbf{x})(f^{\text{iSPN}}(\delta) \cdot y^{\text{iSPN}}) \right) \\
&\propto c^{\text{dSPN}} f^{\text{dSPN}}(\delta) y^{\text{dSPN}} + (-c^{\text{iSPN}} f^{\text{iSPN}}(\delta) y^{\text{iSPN}}). \tag{24}
\end{aligned}$$

611 where  $c^{\text{dSPN}}$  and  $c^{\text{iSPN}}$  are nonnegative because  $\phi'$  is always nonnegative by assumption. Since by  
612 assumption  $f^{\text{d/iSPN}}$  are increasing/decreasing, respectively, the first term of the above sum has  
613 nonnegative correlation with  $\delta y^{\text{dSPN}}$  and the second term has nonnegative correlation with  $\delta y^{\text{iSPN}}$ .  
614 Thus, changes  $\Delta(y^{\text{dSPN}} - y^{\text{iSPN}})$  to difference mode activity are always nonnegatively correlated  
615 with sum mode activity. If we assume that efferent excitation is always sufficiently strong that  
616  $c^{\text{dSPN}} = \phi'(\mathbf{w}^{\text{dSPN}} \cdot \mathbf{x})$  and  $c^{\text{iSPN}} = \phi'(\mathbf{w}^{\text{iSPN}} \cdot \mathbf{x})$  are positive, and that there are no values of  $\delta$   
617 for which  $f^{\text{d/iSPN}}(\delta)$  both have zero derivative, we can further guarantee that changes to difference  
618 mode activity will always be *positively* correlated with sum mode activity.

## 619 Generalizing the model to a distributed code for actions

620 In our model simulations in the main text we assumed for convenience that there is a single dSPN  
621 and iSPN that promote and suppress each available action, respectively. It is more realistic to model  
622 the code for action as distributed among many SPNs. Our model generalizes easily to this case; all  
623 that is necessary is for the efferent activity following action selection to excite the vectors (for both  
624 dSPNs and iSPNs) in population activity space corresponding to that action. To demonstrate this,  
625 we conducted a simulation with  $N = 1000$  dSPNs and iSPNs each,  $S = 10$  input cues (one-hot  
626 input vectors), and  $A = 10$  actions, with one correct action for each input state. Feedforward SPN  
627 activity is given by

$$y_i^{\text{dSPN}} = \phi \left( \sum_{j=1}^M w_{ij}^{\text{dSPN}} x_j \right) \tag{25}$$

$$y_i^{\text{iSPN}} = \phi \left( \sum_{j=1}^M w_{ij}^{\text{iSPN}} x_j \right) \tag{26}$$

628 The log-likelihood of an action  $a$  being performed is proportional to

$$\ell_a = \sum_{i=1}^N \zeta_{ai}^{\text{dSPN}} y_i^{\text{dSPN}} - \zeta_{ai}^{\text{iSPN}} y_i^{\text{iSPN}} \tag{27}$$

629 where  $\zeta_{ai}^{\text{dSPN}}$  and  $\zeta_{ai}^{\text{iSPN}}$  are randomly sampled uniformly in the interval  $[0, 1]$  and then normalized  
 630 so that each vector  $\zeta_{\mathbf{a}}^{\text{dSPN}}$  and  $\zeta_{\mathbf{a}}^{\text{iSPN}}$  has norm 1. Thus, the contribution of each dSPN/iSPN to  
 631 the promotion/suppression of each action is randomly distributed.

632 In the efference model, following selection of an action  $a^*$ , activity of the SPNs associated with action  
 633  $a^*$  is updated as follows, so that efference activity excites the modes  $\zeta_{\mathbf{a}^*}^{\text{dSPN}}$  and  $\zeta_{\mathbf{a}^*}^{\text{iSPN}}$  associated  
 634 with the selected action:

$$y_i^{\text{dSPN}} \leftarrow \phi \left( c_{\text{efference}} \cdot \zeta_{a^*i}^{\text{dSPN}} + \sum_{j=1}^M w_{ij}^{\text{dSPN}} x_j \right) \quad (28)$$

$$y_i^{\text{iSPN}} \leftarrow \phi \left( c_{\text{efference}} \cdot \zeta_{a^*i}^{\text{iSPN}} + \sum_{j=1}^M w_{ij}^{\text{iSPN}} x_j \right) \quad (29)$$

$$(30)$$

635 We also experiment with a generalization of the canonical action selection model to this distributed  
 636 action tuning architecture, in which following action selection, SPN activity is set to

$$y_i^{\text{dSPN}} \leftarrow \zeta_{a^*i}^{\text{dSPN}} \quad (31)$$

$$y_i^{\text{iSPN}} \leftarrow \left( \max_{i'} \zeta_{a^*i'}^{\text{iSPN}} \right) - \zeta_{a^*i}^{\text{iSPN}} \quad (32)$$

$$(33)$$

637 In this model, dSPNs are excited in proportion to their contribution to the currently selected action  
 638 and iSPNs are suppressed in proportion to their degree of inhibition of the currently selected action.

639 The plasticity rules used are the same as in the main text.

640 We find that the results of the main text – that the canonical action selection model fails to learn  
 641 from negative rewards, while the efference model successfully learns from both reward protocols –  
 642 is replicated (Supp. Fig. 2).

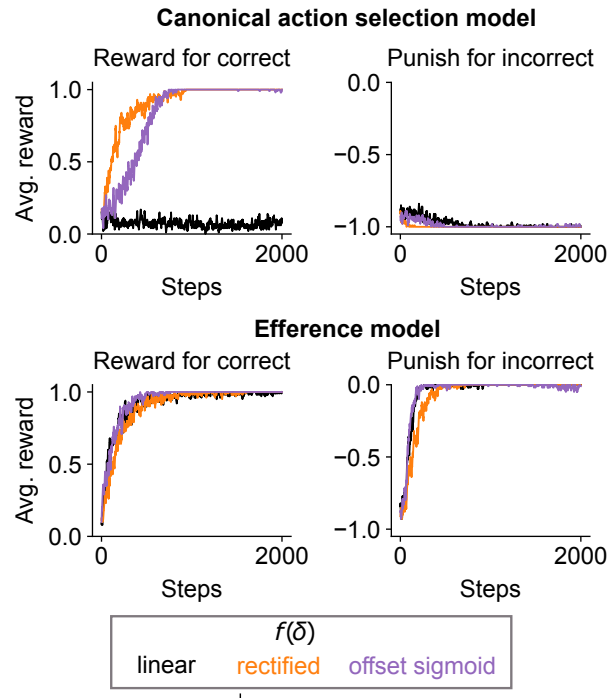

Supplemental Fig. 2: Performance of striatal RL models with a distributed code for actions on a task with 10 cortical input states, 10 available actions, and one correct action for each input state.

### 643 Photometry analysis with reversed indicators

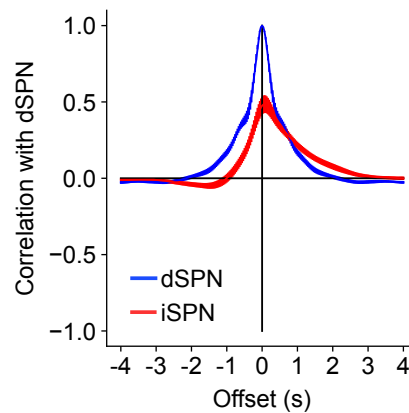

Supplemental Fig. 3: Same as Fig. 5C, but performing the analysis on subjects with reversed assignment of indicators to SPN types.

## 644 Comparison of selectivity of dSPNs and iSPNs

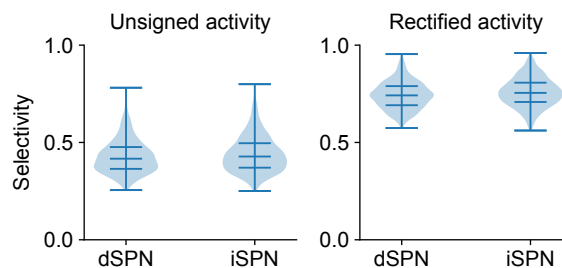

Supplemental Fig. 4: Comparison of dSPN and iSPN tuning selectivity. Violin plots indicate the distribution of selectivity values across all neurons computed using Eq. 34, using either unsigned (left) or rectified (right) z-scored activity as the raw measure of a neuron’s tuning to a behavioral syllable. Horizontal lines indicate the 0, 25, 50, 75, 100 percentile values of the distribution.

645 To test whether dSPNs or iSPNs exhibit greater or less specificity in their tuning to behaviors,  
646 we computed the selectivity of each neuron in the imaging data of Fig. 6. For each neuron, we  
647 computed its average z-scored activity  $a_i$  in response to each of the behavioral syllables  $i \in \{1, \dots, A\}$   
648 in the dataset. Common measures of selectivity require a nonnegative measurement of a neuron’s  
649 tuning to a given condition. Thus, we conducted the analysis in two ways, using either the unsigned  
650 activity  $|a_i|$  or the rectified activity  $\max(a_i, 0)$  as the measure of the neuron’s tuning  $t_i$  to syllable  $i$ .  
651 The selectivity was then computed using the following expression introduced in prior work (Treves  
652 and Rolls, 1991; Willmore and Tolhurst, 2001):

$$\frac{\left(\frac{1}{A} \sum_i t_i\right)^2}{\frac{1}{A} \sum_i t_i^2} \quad (34)$$

653 This value ranges from 0 to 1, and higher value indicates that fluctuations in a neuron’s activity are  
654 driven primarily by one or a few behavioral syllables. The results are shown in Supp. Fig. 4. The  
655 selectivity values are fairly modest (consistent with a distributed code for actions) and comparable  
656 between dSPNs and iSPNs.

## 657 Alternative model with shared plasticity rule among all SPNs

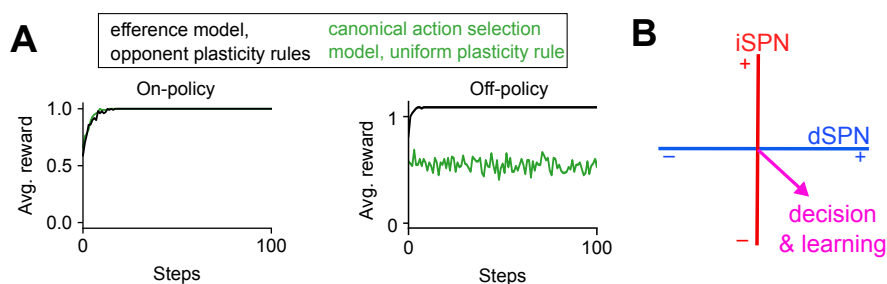

Supplemental Fig. 5: Comparison to counterfactual model in which iSPNs use the same plasticity rule as dSPNs. A. Left: performance of simulated striatal RL system using efference model with the opponent dSPN/iSPN plasticity rules used elsewhere in the paper (black, same as Fig. 3E), and a system using the canonical action selection model and identical dSPN and iSPN plasticity rules (green). Right: same as left panel, but in an off-policy setting in which another pathway controls behavior during and always chooses the correct action, and the performance of the striatal RL system is evaluated over time. Here the Q-learning model of dopamine activity is used. B. In the counterfactual model in which iSPNs use the same plasticity rule as dSPNs, activity in the difference mode (dSPN - iSPN) influences (via plasticity) changes in future difference mode activity that affect decision-making.

658 The issues identified in Fig. 2 with the canonical action selection model are a consequence of the  
659 iSPN plasticity rule. From a normative perspective is interesting to consider why the empirically  
660 observed iSPN plasticity rule might be advantageous, compared to an alternative model in which  
661 iSPNs share the same plasticity rule as dSPNs. For instance, this alternative model can solve  
662 the two-alternative forced choice task of Fig. 2 with both positive and negative reward protocols  
663 (Supp. Fig. 5A, left). However, the limitations of this alternative model are revealed in the off-  
664 policy learning setting, where the Q-learning algorithm is required. In this case, SPN activity must  
665 encode Q-values associated with each action, but in the canonical action selection model, these  
666 values are disrupted by the updates to SPN activity following action selection. This is because  
667 the activity updates in the canonical action selection model modify difference mode activity, which  
668 (when dSPN and iSPN plasticity rules are the same) is needed for learning (Supp. Fig. 5B). As a  
669 result, the predicted Q-values are inaccurate, and the model has difficulty learning the true value  
670 of each action. We demonstrate this in the two-alternative forced task in an off-policy learning  
671 protocol where an oracle chooses the correct action on each trial, and the striatal pathway's ability  
672 to solve the task independently is evaluated. The efference activity model has no issue due to the  
673 orthogonality of the efferent activity and difference modes as described above, but the canonical  
674 action selection model fails to solve the task (Supp. Fig. 5A, right).

675 We note that non-orthogonality of the activity mode used for learning and behavior could cause  
676 other problems besides impairing the system's ability to implement off-policy learning algorithms;  
677 for instance, even in an on-policy setting it could interfere with sequential action selection at rapid  
678 timescales.

## 679 Models used for dopamine analysis

680 We experimented with models that predict transition probabilities  $P(s_{t-1}, s_t)$  based on average  
681 dopamine activity  $D(s_{t-1}, s_t)$  associated with each transition.

682

683 *Q-learning model:* In the Q-learning model, the mouse maintains an internal estimate of the value  
684  $Q(s_{t-1}, s_t)$  of each transition between syllables. In the absence of explicit rewards, the dopamine  
685 activity associated with a syllable transition is predicted to be:  $D(s_{t-1}, s_t) = \max_{s'} Q(s_t, s') -$   
686  $Q(s_{t-1}, s_t)$ . We inferred a set of Q-values by initializing a Q-table with all zero values and running  
687 gradient descent on the Q-table to minimize the mean squared error between the predicted and  
688 empirical values of  $D(s_{t-1}, s_t)$ . These inferred Q-values were used to predict behavioral transition  
689 probabilities according to:  $\hat{P}(s_{t-1}, s_t) = \frac{e^{\beta(s_{t-1})Q(s_{t-1}, s_t)}}{\sum_{s'} e^{\beta(s_{t-1})Q(s_{t-1}, s')}}$ . We did not fit the value of  $\beta(s_{t-1})$  but  
690 rather chose it to be the reciprocal of the standard deviation of  $Q(s_{t-1}, s')$  across all  $s'$ , to ensure  
691 a reasonable dynamic range in predicted transition probabilities.

692 *V(s) TD learning model:* In this model, the mouse maintains an internal estimate of the value  $V(s)$   
693 of each syllable, and the predicted dopamine activity at each transition is  $D(s_{t-1}, s_t) = V(s_t) -$   
694  $V(s_{t-1})$ . We fit the vector of values  $V(s)$  to minimize the mean squared error of predicted and  
695 empirical  $D(s_{t-1}, s_t)$ . The predicted transition probabilities in this model (which are independent  
696 of the previous syllable  $s_{t-1}$ ) are:  $\hat{P}(s_{t-1}, s_t) = \frac{e^{\beta V(s_t)}}{\sum_{s'} e^{\beta V(s')}}$  with  $\beta$  chosen to normalize the  $V(s')$  to  
697 have standard deviation 1, as in the previous models.

698 *Action value model:* In this model, we assume that dopamine activity simply reflects the proba-  
699 bility of each transition rather than encoding a prediction error; that is, we assume  $P(s_{t-1}, s_t) =$   
700  $\frac{D(s_{t-1}, s_t)}{\sum_s D(s_{t-1}, s)}$ .

701 *State value model:* In this model, we assume that dopamine activity simply reflects the proba-  
702 bility of each behavioral syllable being chosen and is independent of the previous syllable. That  
703 is, we compute the average dopamine activity  $D(s)$  associated with each syllable  $s$ , and predict  
704  $P(s_{t-1}, s_t) = \frac{D(s_t)}{\sum_s D(s)}$ .
